# Supplementary material for: Status of Glucocorticoid-Induced Osteoporosis Preventive Care in Korea: A Retrospective Cohort Study on the Korean National Health Insurance Service Database
Source: MDPI journal article supplement (doi:10.3390/medicina58020324), 2022-02-21
Supplement: s1 [file s1]

**Supplementary Table S1. Comparisons of clinical characteristics according to bone mineral density test**

|                                             | No BMD test<br>(n=36,591) | BMD test<br>(n=542) | p      |
|---------------------------------------------|---------------------------|---------------------|--------|
| <b>Age</b>                                  |                           |                     |        |
| <40 years, n (%)                            | 10,291 (28.1)             | 16 (3)              | <0.001 |
| 40~49 years, n (%)                          | 7,765 (21.2)              | 53 (9.8)            |        |
| 50~59 years, n (%)                          | 8,678 (23.7)              | 120 (22.1)          |        |
| 60~69 years, n (%)                          | 5,692 (15.6)              | 147 (27.1)          |        |
| ≥ 70 years, n (%)                           | 4,165 (11.4)              | 206 (38)            |        |
| Age, years, mean ± SD                       | 49.9 ± 15.3               | 64 ± 12             | <0.001 |
| Female, n (%)                               | 18,043 (49.3)             | 433 (79.9)          | <0.001 |
| <b>Residence</b>                            |                           |                     |        |
| Urban, n (%)                                | 33,443 (91.4)             | 456 (84.1)          | <0.001 |
| Rural, n (%)                                | 3,148 (8.6)               | 86 (15.9)           |        |
| <b>Institution</b>                          |                           |                     |        |
| Tertiary/general hospital, n (%)            | 5,720 (15.6)              | 141 (26)            | <0.001 |
| Primary care clinic/nursing hospital, n (%) | 30,871 (84.4)             | 401 (74)            |        |
| <b>Initial GCs prescriber specialty</b>     |                           |                     |        |
| Rheumatologist, n (%)                       | 392 (1.1)                 | 23 (4.2)            | <0.001 |
| Non-rheumatologist internist, n (%)         | 11,428 (31.2)             | 180 (33.2)          |        |
| Others, n (%)                               | 24,771 (67.7)             | 339 (62.5)          |        |
| <b>GCs requiring conditions</b>             |                           |                     |        |
| Systemic autoimmune diseases, n (%)         | 1,206 (3.3)               | 68 (12.5)           | <0.001 |
| Chronic pulmonary diseases, n (%)           | 3,099 (8.5)               | 72 (13.3)           |        |
| Others, n (%)                               | 32,286 (88.2)             | 402 (74.2)          |        |
| Cumulative GCs dose*, mg, mean ± SD         | 204.4 ± 151               | 268.4 ± 170.8       | <0.001 |
| <b>Comorbidities</b>                        |                           |                     |        |
| Hyperparathyroidism, n (%)                  | 8 (0)                     | 0 (0)               | 0.736  |

|                        |           |          |        |
|------------------------|-----------|----------|--------|
| Hyperthyroidism, n (%) | 563 (1.5) | 16 (3)   | 0.008  |
| Hypothyroidism, n (%)  | 907 (2.5) | 22 (4.1) | 0.019  |
| Malignancy, n (%)      | 1,096 (3) | 31 (5.7) | <0.001 |

---

\* Cumulative GCs dose in the first 90 days after the initiation of GCs therapy

BMD bone mineral density, SD standard deviation, GCs glucocorticoids.

**Supplementary Table S2. Comparisons of clinical characteristics according to the use of calcium and/or vitamin D.**

|                                             | No calcium/vitamin D<br>(n=36,522) | Calcium/vitamin D<br>(n=611) | p      |
|---------------------------------------------|------------------------------------|------------------------------|--------|
| <b>Age</b>                                  |                                    |                              |        |
| <40 years, n (%)                            | 10,226 (28)                        | 81 (13.3)                    | 0.001  |
| 40~49 years, n (%)                          | 7,706 (21.1)                       | 112 (18.3)                   |        |
| 50~59 years, n (%)                          | 8,607 (23.6)                       | 191 (31.3)                   |        |
| 60~69 years, n (%)                          | 5,726 (15.7)                       | 113 (18.5)                   |        |
| ≥ 70 years, n (%)                           | 4,257 (11.7)                       | 114 (18.7)                   |        |
| Age, years, mean ± SD                       | 48.7 ± 15.3                        | 55.6 ± 14.2                  | <0.001 |
| Female, n (%)                               | 18,081 (49.5)                      | 395 (64.6)                   | <0.001 |
| <b>Residence</b>                            |                                    |                              |        |
| Urban, n (%)                                | 33,346 (91.3)                      | 553 (90.5)                   | 0.489  |
| Rural, n (%)                                | 3,176 (8.7)                        | 58 (9.5)                     |        |
| <b>Institution</b>                          |                                    |                              |        |
| Tertiary/general hospital, n (%)            | 5,685 (15.6)                       | 176 (28.8)                   | <0.001 |
| Primary care clinic/nursing hospital, n (%) | 30,837 (84.4)                      | 435 (71.2)                   |        |
| <b>Initial GCs prescriber specialty</b>     |                                    |                              |        |
| Rheumatologist, n (%)                       | 395 (1.1)                          | 20 (3.3)                     | <0.001 |
| Non-rheumatologist internist, n (%)         | 3,112 (8.5)                        | 59 (9.7)                     |        |
| Others, n (%)                               | 32,314 (88.2)                      | 474 (77.6)                   |        |
| <b>GCs requiring conditions</b>             |                                    |                              |        |
| Systemic autoimmune diseases, n (%)         | 1,196 (3.3)                        | 78 (12.8)                    | <0.001 |
| Chronic pulmonary diseases, n (%)           | 3,112 (8.5)                        | 59 (9.7)                     |        |
| Others, n (%)                               | 32,214                             | 474 (77.6)                   |        |
| Cumulative GCs dose*, mg, mean ± SD         | 204 ± 151.1                        | 196.4 ± 168.3                | 0.272  |

Comorbidities

|                            |           |          |        |
|----------------------------|-----------|----------|--------|
| Hyperparathyroidism, n (%) | 8 (0)     | 0 (0)    | 0.715  |
| Hyperthyroidism, n (%)     | 560 (1.5) | 19 (3.1) | 0.002  |
| Hypothyroidism, n (%)      | 904 (2.5) | 25 (4.1) | 0.011  |
| Malignancy, n (%)          | 1,081 (3) | 46 (7.5) | <0.001 |

---

\* Cumulative GCs dose in the first 90 days after the initiation of GCs therapy

SD standard deviation, GCs glucocorticoids.

**Supplementary Table S3. Comparisons of clinical characteristics according to the use of osteoporosis medications**

|                                             | No OP medications<br>(n=36,526) | OP medications<br>(n=607) | p      |
|---------------------------------------------|---------------------------------|---------------------------|--------|
| <b>Age</b>                                  |                                 |                           |        |
| <40 years, n (%)                            | 10,271 (28.1)                   | 36 (5.9)                  | <0.001 |
| 40~49 years, n (%)                          | 7,721 (21.1)                    | 97 (16)                   |        |
| 50~59 years, n (%)                          | 8,631 (23.6)                    | 167 (27.5)                |        |
| 60~69 years, n (%)                          | 5,694 (15.6)                    | 145 (23.9)                |        |
| ≥ 70 years, n (%)                           | 4,209 (11.5)                    | 162 (26.7)                |        |
| Age, years, mean ± SD                       | 49.7 ± 15.3                     | 59.7 ± 13.1               | <0.001 |
| Female, n (%)                               | 17,951 (49.1)                   | 525 (86.5)                | <0.001 |
| <b>Residence</b>                            |                                 |                           |        |
| Urban, n (%)                                | 33,357 (91.3)                   | 542 (89.3)                | <0.001 |
| Rural, n (%)                                | 3,169 (8.7)                     | 65 (10.7)                 |        |
| <b>Institution</b>                          |                                 |                           |        |
| Tertiary/general hospital, n (%)            | 5,729 (15.7)                    | 132 (21.7)                | <0.001 |
| Primary care clinic/nursing hospital, n (%) | 30,797 (84.3)                   | 475 (78.3)                |        |
| <b>Initial GCs prescriber specialty</b>     |                                 |                           |        |
| Rheumatologist, n (%)                       | 406 (1.1)                       | 9 (1.5)                   | 0.538  |
| Non-rheumatologist internist, n (%)         | 11,411 (31.2)                   | 197 (31.2)                |        |
| Others, n (%)                               | 24,709 (67.6)                   | 401 (66.1)                |        |
| <b>GCs requiring conditions</b>             |                                 |                           |        |
| Systemic autoimmune diseases, n (%)         | 1,220 (3.3)                     | 54 (8.9)                  | <0.001 |
| Chronic pulmonary diseases, n (%)           | 3,117 (8.5)                     | 54 (8.9)                  |        |
| Others, n (%)                               | 32,189 (88.1)                   | 499 (82.2)                |        |
| Cumulative GCs dose*, mg, mean ± SD         | 203.9 ± 150.1                   | 198.8 ± 212.4             | <0.001 |
| <b>Comorbidities</b>                        |                                 |                           |        |
| Hyperparathyroidism, n (%)                  | 8 (0)                           | 0 (0)                     | 0.715  |

|                        |           |          |       |
|------------------------|-----------|----------|-------|
| Hyperthyroidism, n (%) | 566 (1.5) | 13 (2.1) | 0.243 |
| Hypothyroidism, n (%)  | 904 (2.5) | 25 (4.1) | 0.01  |
| Malignancy, n (%)      | 1,106 (3) | 21 (3.5) | 0.539 |

---

\* Cumulative GCs dose in the first 90 days after the initiation of GCs therapy

OP osteoporosis, SD standard deviation, GCs glucocorticoids.

**Supplementary Table S4. Associated factors for the bone mineral density test**

|                                      | Crude OR (95% CI)  | p      | Adjusted OR (95% CI) | p      |
|--------------------------------------|--------------------|--------|----------------------|--------|
| Age                                  |                    |        |                      |        |
| <40 years                            | 1 (ref.)           |        | 1 (ref.)             |        |
| 40~49 years                          | 4.39 (2.5-7.68)    | <0.001 | 4.23 (2.42-7.42)     | <0.001 |
| 50~59 years                          | 8.89 (5.28-15)     | <0.001 | 8.94 (5.29-15.11)    | <0.001 |
| 60~69 years                          | 16.61 (9.91-27.85) | <0.001 | 18.93 (11.25-31.85)  | <0.001 |
| ≥ 70 years                           | 31.81 (19.1-52.97) | <0.001 | 34.83 (20.81-58.3)   | <0.001 |
| Male                                 | 0.25 (0.2-0.3)     | <0.001 | 0.2 (0.16-0.25)      | <0.001 |
| Residence                            |                    |        |                      |        |
| Urban                                | 1 (ref.)           |        | 1 (ref.)             |        |
| Rural                                | 2 (1.59-2.53)      | <0.001 | 1.43 (1.13-1.83)     | 0.004  |
| Institution                          |                    |        |                      |        |
| Tertiary/general hospital            | 1 (ref.)           |        | 1 (ref.)             |        |
| Primary care clinic/nursing hospital | 0.53 (0.43-0.64)   | <0.001 | 0.71 (0.57-0.89)     | 0.002  |
| Initial GCs prescriber specialty     |                    |        |                      |        |
| Rheumatologist                       | 1 (ref.)           |        | 1 (ref.)             |        |
| Non-rheumatologist internist         | 0.27 (0.17-0.42)   | <0.001 | 0.69 (0.4-1.18)      | 0.172  |
| Others                               | 0.23 (0.15-0.36)   | <0.001 | 0.72 (0.42-1.23)     | 0.231  |
| Glucocorticoid requiring conditions  |                    |        |                      |        |
| Others                               | 1 (ref.)           |        | 1 (ref.)             |        |
| Systemic autoimmune diseases         | 4.53 (3.48-5.89)   | <0.001 | 3.47 (2.62-4.59)     | <0.001 |
| Chronic pulmonary diseases           | 1.87 (1.45-2.4)    | <0.001 | 1.03 (0.78-1.38)     | 0.05   |
| Cumulative GCs dose*, g              | 0.1 (0.05-0.22)    | <0.001 | 1.27 (0.83-1.93)     | 0.387  |
| Comorbidities                        |                    |        |                      |        |
| Hyperparathyroidism                  | N/A                | 0.973  | -                    | -      |
| Hyperthyroidism                      | 1.95 (1.18-3.22)   | 0.001  | 1.66 (1.03-2.66)     | 0.111  |
| Hypothyroidism                       | 1.67 (1.08-2.56)   | 0.021  | 1.13 (0.75-1.72)     | 0.874  |
| Malignancy                           | 1.97 (1.36-2.84)   | <0.001 | 1.98 (1.43-2.73)     | 0.056  |

\* Cumulative GCs dose in the first 90 days after the initiation of GCs therapy

OR odds ratio, GCs glucocorticoids



**Supplementary Table S5. Associated factors for the use of calcium and/or vitamin D.**

|                                      | Crude OR (95% CI) | p      | Adjusted OR (95% CI) | p      |
|--------------------------------------|-------------------|--------|----------------------|--------|
| Age                                  |                   |        |                      |        |
| <40 years                            | 1 (ref.)          |        | 1 (ref.)             |        |
| 40~49 years                          | 1.83 (1.38-2.45)  | <0.001 | 1.77 (1.32-2.36)     | 0.001  |
| 50~59 years                          | 2.8 (2.16-3.64)   | <0.001 | 2.7 (2.07-3.52)      | <0.001 |
| 60~69 years                          | 2.49 (1.87-3.32)  | <0.001 | 2.54 (1.9-3.4)       | <0.001 |
| ≥ 70 years                           | 3.38 (2.54-4.5)   | <0.001 | 3.43 (2.55-4.6)      | <0.001 |
| Male                                 | 0.54 (0.45-0.63)  | <0.001 | 0.5 (0.42-0.59)      | <0.001 |
| Residence                            |                   |        |                      |        |
| Urban                                | 1 (ref.)          |        | 1 (ref.)             |        |
| Rural                                | 1.1 (0.84-4.45)   | 0.489  | 0.98 (0.75-1.3)      | 0.924  |
| Institution                          |                   |        |                      |        |
| Tertiary/general hospital            | 1 (ref.)          |        | 1 (ref.)             |        |
| Primary care clinic/nursing hospital | 0.46 (0.38-0.54)  | <0.001 | 0.59 (0.48-0.72)     | <0.001 |
| Initial GCs prescriber specialty     |                   |        |                      |        |
| Rheumatologist                       | 1 (ref.)          |        | 1 (ref.)             |        |
| Non-rheumatologist internist         | 0.37 (0.23-0.58)  | 0.001  | 1.28 (0.75-2.17)     | 0.364  |
| Others                               | 0.3 (0.19-0.48)   | <0.001 | 1.18 (0.7-1.99)      | 0.544  |
| Glucocorticoid requiring conditions  |                   |        |                      |        |
| Others                               | 1 (ref.)          |        | 1 (ref.)             |        |
| Systemic autoimmune diseases         | 4.43 (3.47-5.67)  | <0.001 | 3.47 (2.62-4.59)     | <0.001 |
| Chronic pulmonary diseases           | 1.29 (0.98-1.69)  | 0.069  | 1.03 (0.78-1.38)     | 0.816  |
| Cumulative GCs dose*, g              | 0.69 (0.38-1.25)  | 0.219  | 1.26 (0.83-1.93)     | 0.271  |
| Comorbidities                        |                   |        |                      |        |
| Hyperparathyroidism                  | N/A               | 0.973  | -                    | -      |
| Hyperthyroidism                      | 2.06 (1.3-3.28)   | 0.002  | 1.66 (1.03-2.66)     | 0.036  |
| Hypothyroidism                       | 1.68 (1.12-2.52)  | 0.012  | 1.13 (0.75-1.72)     | 0.551  |
| Malignancy                           | 2.7 (1.97-3.63)   | <0.001 | 1.98 (1.43-2.73)     | <0.001 |

\* Cumulative GCs dose in the first 90 days after the initiation of GCs therapy

OR odds ratio, GCs glucocorticoids

**Supplementary Table S6. Associated factors for the use of osteoporosis medications.**

|                                            | Crude OR (95% CI)  | p      | Adjusted OR (95% CI) | p      |
|--------------------------------------------|--------------------|--------|----------------------|--------|
| <b>Age</b>                                 |                    |        |                      |        |
| <40 years                                  | 1 (ref.)           |        | 1 (ref.)             |        |
| 40~49 years                                | 3.58 (2.44-5.26)   | <0.001 | 3.65 (2.48-5.36)     | <0.001 |
| 50~59 years                                | 5.52 (3.85-7.92)   | <0.001 | 6.18 (4.29-8.88)     | <0.001 |
| 60~69 years                                | 7.26 (5.04-10.48)  | <0.001 | 9.52 (6.58-13.78)    | <0.001 |
| ≥ 70 years                                 | 10.98 (7.64-15.78) | <0.001 | 14.27 (9.88-20.62)   | <0.001 |
| Male                                       | 0.15 (0.12-0.19)   | <0.001 | 0.13 (0.1-0.16)      | <0.001 |
| <b>Residence</b>                           |                    |        |                      |        |
| Urban                                      | 1 (ref.)           |        | 1 (ref.)             |        |
| Rural                                      | 1.26 (0.97-1.64)   | 0.079  | 0.98 (0.76-1.29)     | 0.922  |
| <b>Institution</b>                         |                    |        |                      |        |
| Tertiary/general hospital                  | 1 (ref.)           |        | 1 (ref.)             |        |
| Primary care clinic/nursing hospital       | 0.67 (0.55-0.81)   | <0.001 | 0.72 (0.58-0.88)     | 0.002  |
| <b>Initial GCs prescriber specialty</b>    |                    |        |                      |        |
| Rheumatologist                             | 1 (ref.)           |        | 1 (ref.)             |        |
| Non-rheumatologist internist               | 0.78 (0.4-0.153)   | 0.466  | 1.89 (0.9-3.95)      | 0.091  |
| Others                                     | 0.73 (0.38-1.43)   | 0.359  | 1.93 (0.93-4.02)     | 0.078  |
| <b>Glucocorticoid requiring conditions</b> |                    |        |                      |        |
| Others                                     | 1 (ref.)           |        | 1 (ref.)             |        |
| Systemic autoimmune diseases               | 2.86 (2.14-3.8)    | <0.001 | 2.5 (1.82-3.44)      | <0.001 |
| Chronic pulmonary diseases                 | 1.12 (0.84-1.48)   | 0.442  | 0.84 (0.62-1.13)     | 0.236  |
| Cumulative GCs dose*                       | 0.78 (0.45-1.39)   | 0.41   | 1.84 (1.23-2.77)     | 0.003  |
| <b>Comorbidities</b>                       |                    |        |                      |        |
| Hyperparathyroidism                        | N/A                | 0.971  | -                    | -      |
| Hyperthyroidism                            | 1.39 (0.8-2.43)    | 0.243  | 1.04 (0.59-1.82)     | 0.905  |
| Hypothyroidism                             | 1.69 (1.13-2.54)   | 0.011  | 1.08 (0.71-1.63)     | 0.729  |
| Malignancy                                 | 1.15 (0.74-1.78)   | 0.539  | 0.85 (0.54-.135)     | 0.494  |

\* Cumulative GCs dose in the first 90 days after the initiation of GCs therapy

OR odds ratio, GCs glucocorticoids
